# Supplementary material
Source: PubMed Central journal article supplement (PMC5949146)
Supplement: NIHMS962003-supplement-2.pdf [file NIHMS962003-supplement-2.pdf]

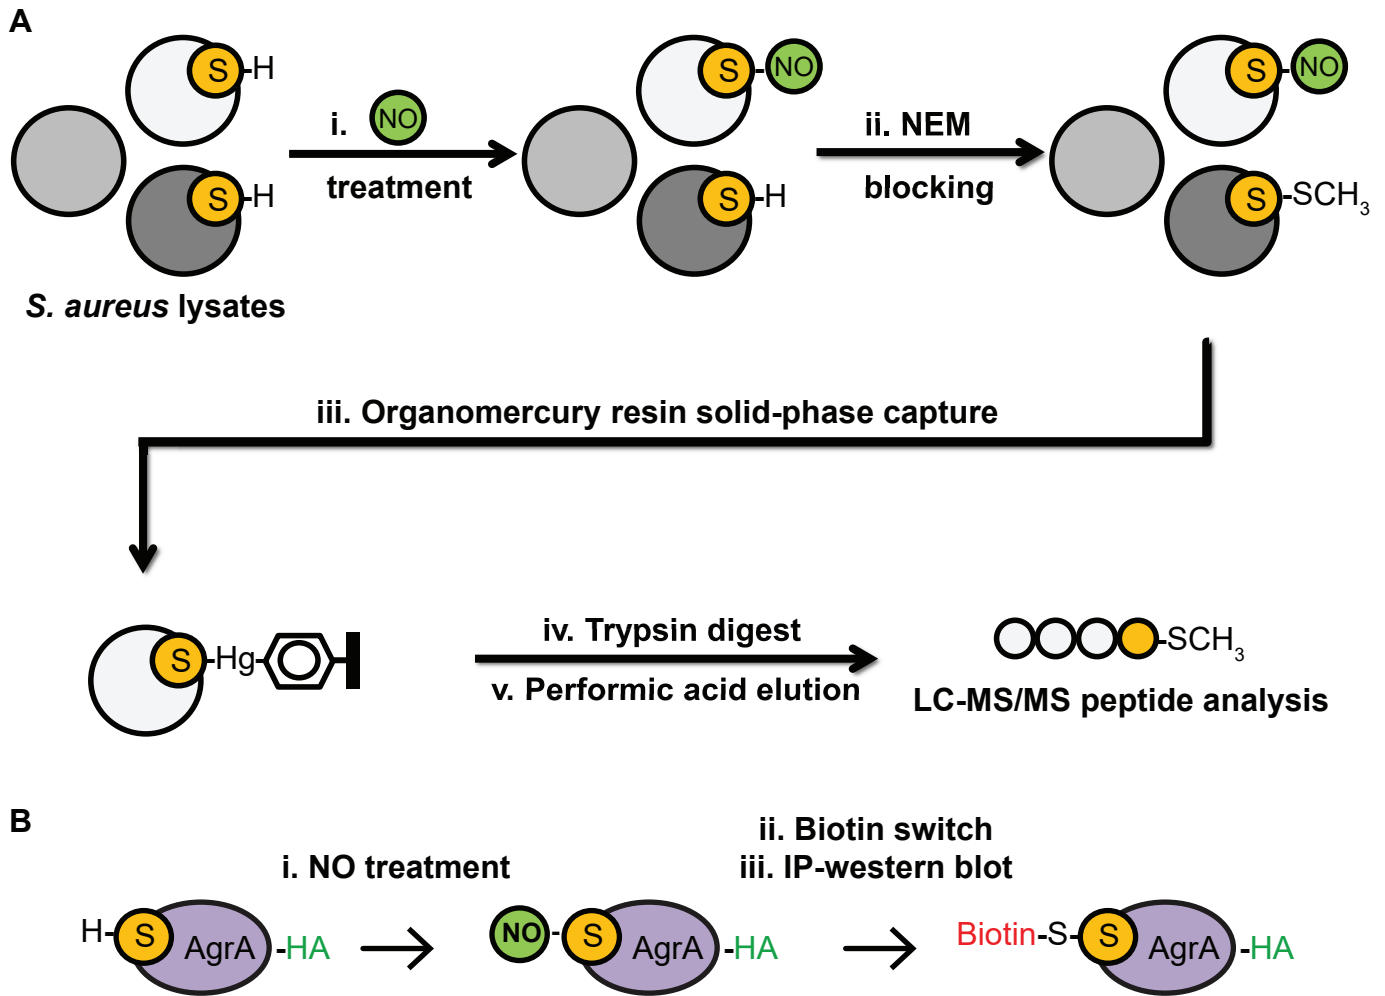

**Figure S1 Related to Figure 1. Biochemical Methods to Detect S-nitrosylation in *S. aureus* Lysates**

(A) Experimental strategy to identify S-nitrosylated proteins following NO treatment of bacterial lysates by mercury resin-assisted capture of S-nitrosopeptides and mass spectrometry-based identification. NEM, N-ethylmaleimide.

(B) Biotin-switch assay of NO-treated bacterial lysates containing hemagglutinin-tagged AgrA with biotinylation of S-nitrosylated sulfhydryl groups and detection by immunoprecipitation-western blot. HA, hemagglutinin; IP, immunoprecipitation.



**Figure S2 Related to Figure 3. Amino Acid Sequence Alignment of AgrA with LytTR  
Transcription Regulators**

Amino acid similarities and identities are shaded gray; stars show the position of cysteine residues also present in *S. aureus* AgrA; red stars indicate cysteines shown to mediate NO inhibition in this study.

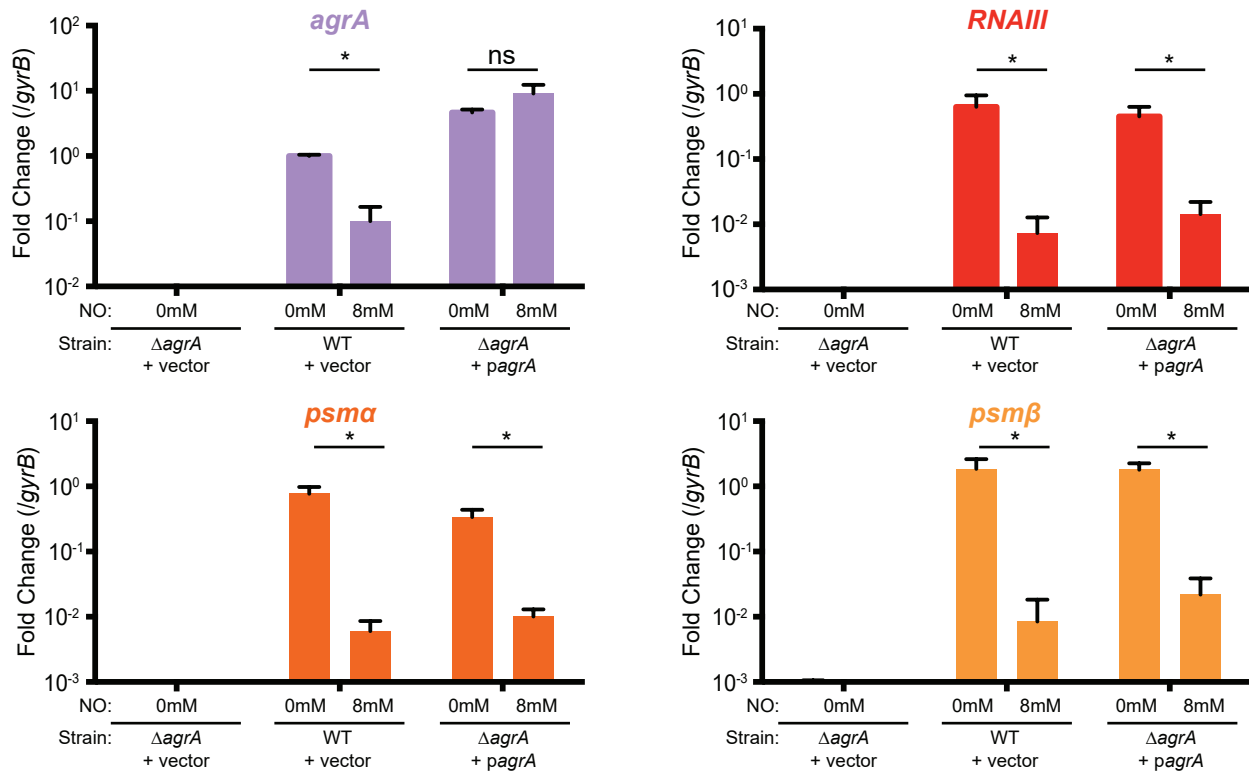

**Figure S3 Related to Figure 4. Nitric Oxide-Sensitivity of AgrA-Activated Genes in *S. aureus* with Constitutive Expression of AgrA from a Non-Native Promoter**

RT-qPCR of AgrA-regulated genes after NO-treatment of *S. aureus*  $\Delta agrA$  *pagrA* cultures expressing AgrA from the T5X non-native promoter (n=3). Data are represented as means with error bars showing standard deviation.

Student's t test, \* $p < 0.05$ ; ns, not significant.

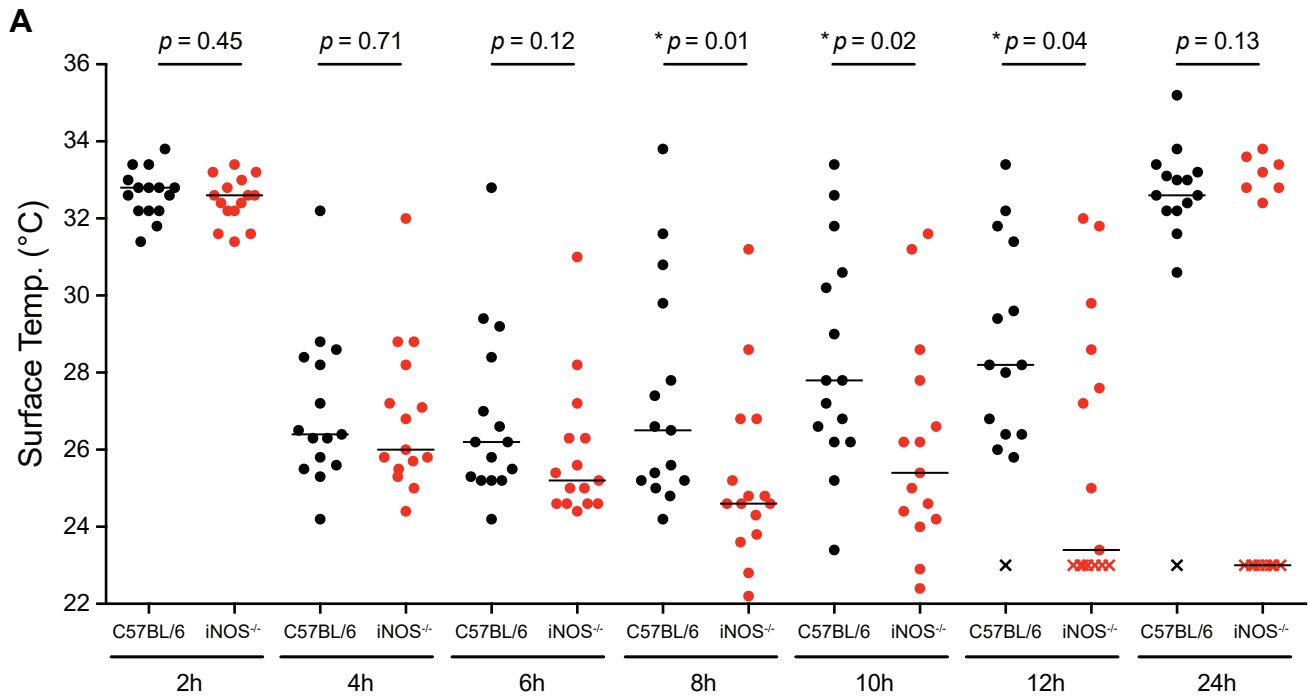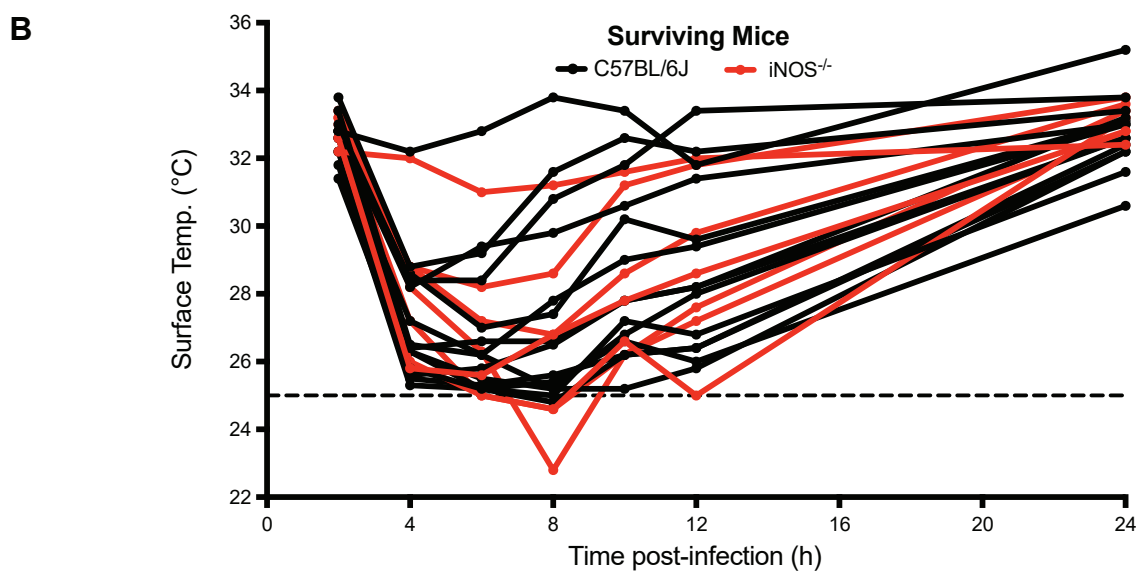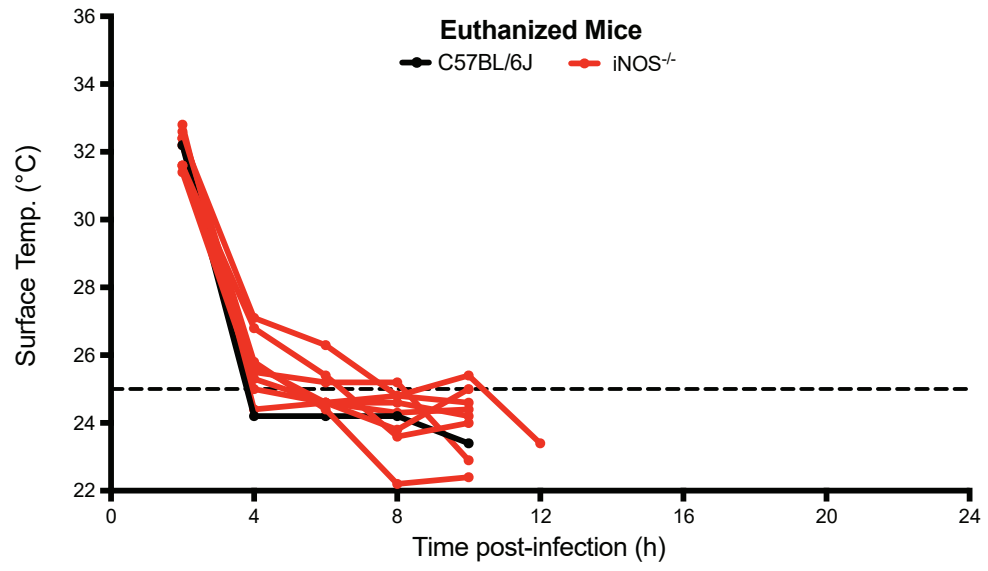

**Figure S4 Related to Figure 5A. Body Surface Temperature of Mice Infected with *S. aureus***

(A) Surface temperature of C57BL/6 (black circles, n=15) and congenic iNOS<sup>-/-</sup> (red circles, n=15) mice at indicated time points post-infection with *S. aureus* Newman. Individual values are plotted with horizontal lines showing medians of groups.

X= mice euthanized due to a moribund state; Mann-Whitney U test, \*p<0.05.

(B) Measurements of body surface temperature in surviving (top) and moribund (bottom) mice (C57BL/6, black lines, n=15; iNOS<sup>-/-</sup>, red lines, n=15) at indicated time points post-infection.

Dashed line at y=25°C marks one criterion used for euthanasia. Other euthanasia criteria included low mobility, labored breathing and a moribund state.

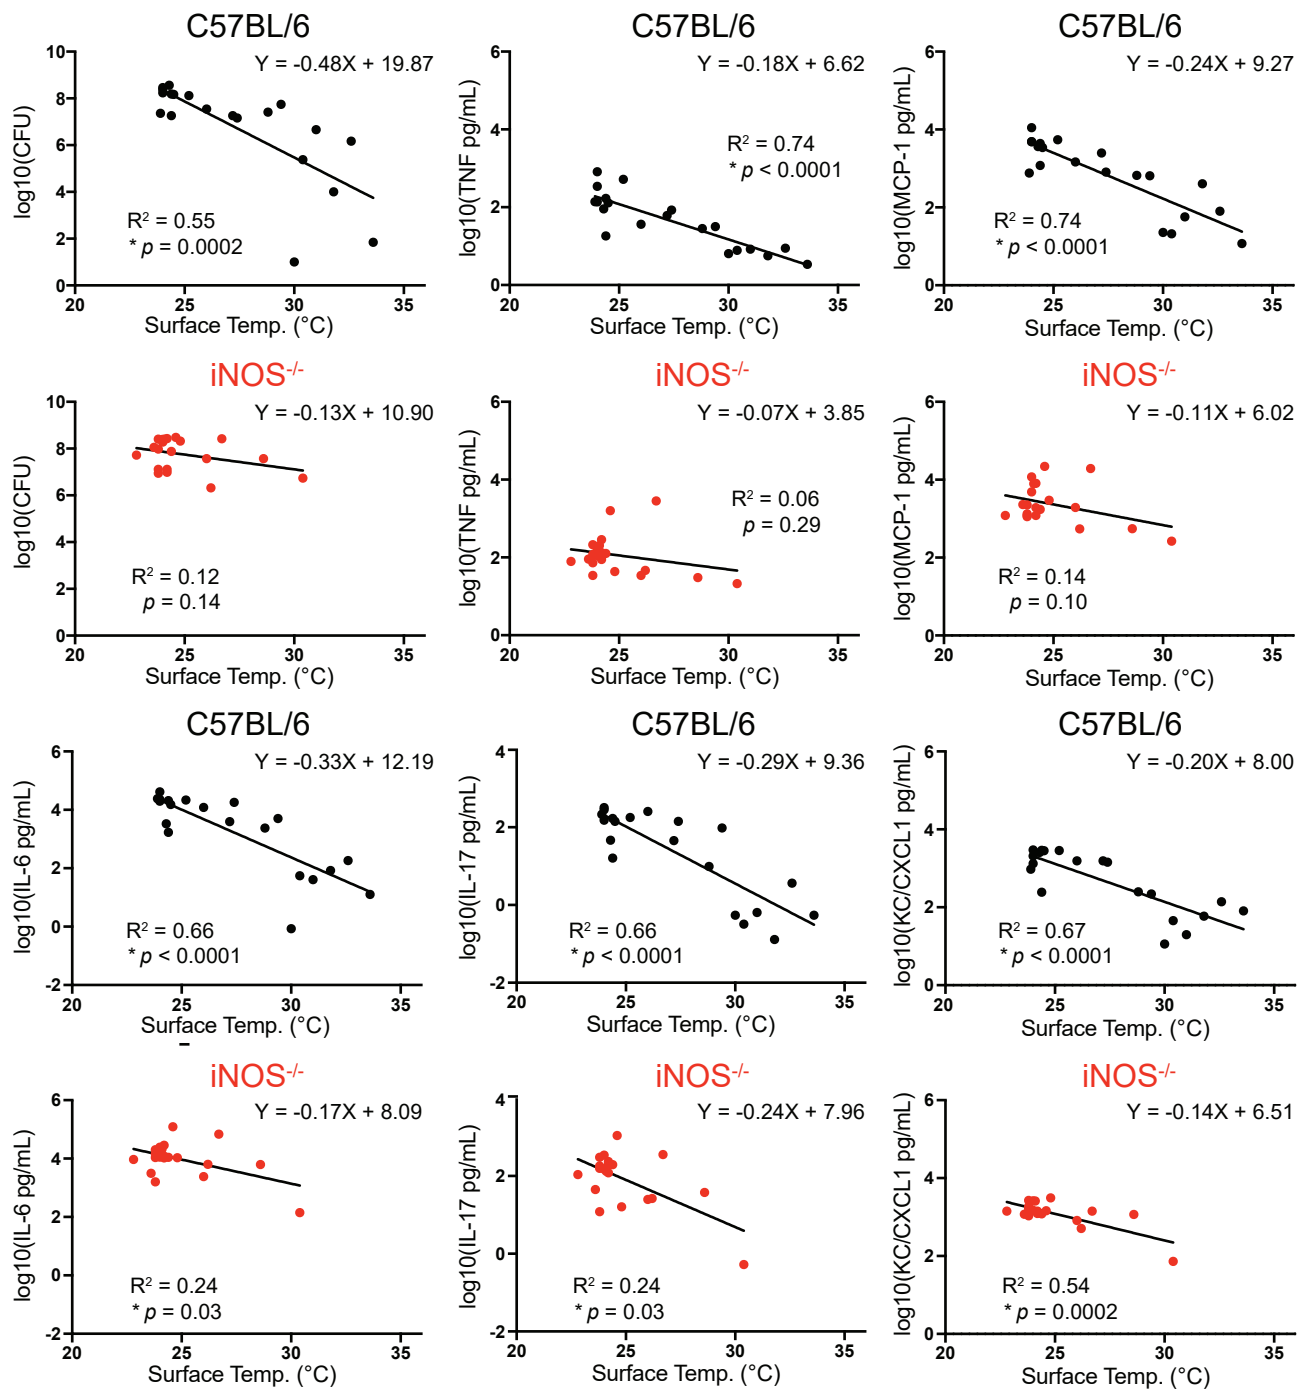

**Figure S5 Related to Figure 5B. Linear Regression Analysis of Body Surface Temperature Against Bacterial Burden and Serum Cytokines**

Relationship of mouse body surface temperature with log10 transformed bacterial burden (CFU/Lung) and cytokine serum levels (pg/mL) in C57BL/6 (black) and congenic iNOS knockout mice (red).

$R^2$  indicates goodness of fit;  $*p < 0.05$  indicates slope is different from zero,  $n = 20$ .



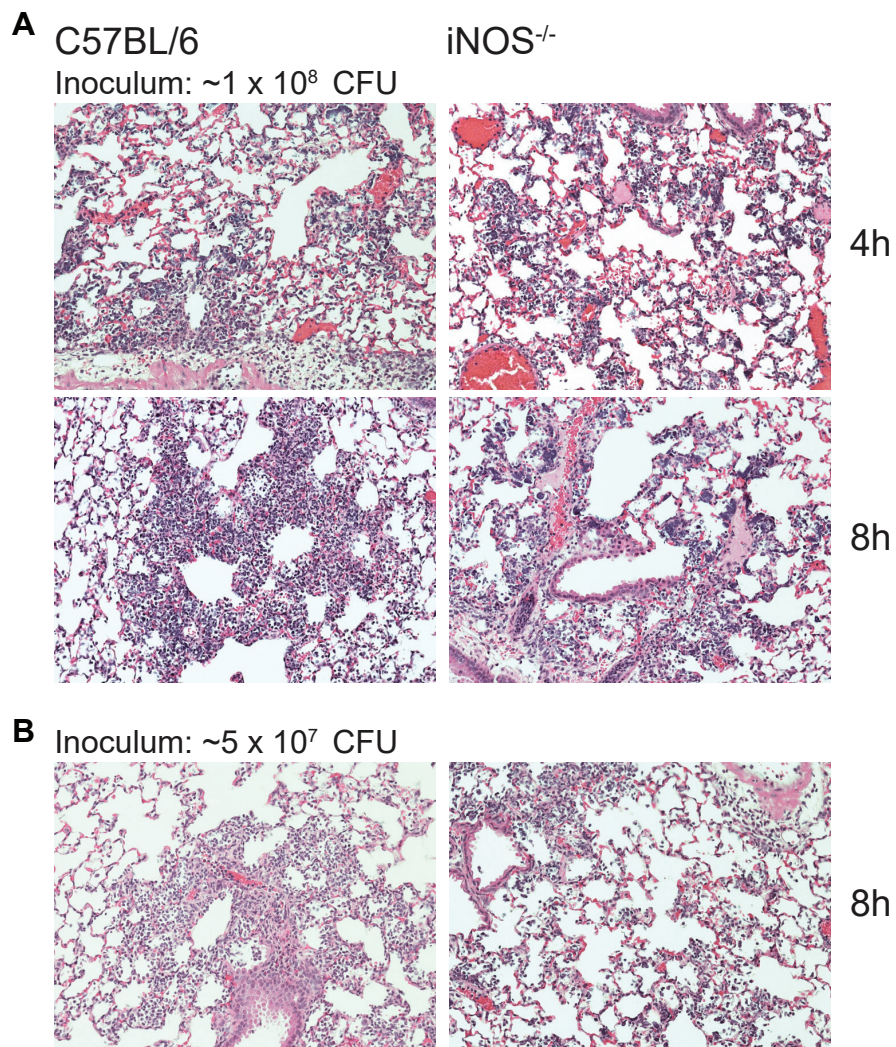

**Figure S6 Related to Figure 6. Deficiency in Host Nitric Oxide Production Alters the Histopathological Pattern of Staphylococcal Pneumonia**

(A) Representative H&E stains of lung sections at 20x magnification from C57BL/6 and iNOS knockout female mice infected with  $\sim 1 \times 10^8$  CFU at 4 h (top panels) and 8 h (bottom panels) post-infection.

(B) Representative H&E stains of lung sections at 20x magnification from C57BL/6 and iNOS knockout female mice infected with  $\sim 5 \times 10^7$  CFU at 8 h post-infection.



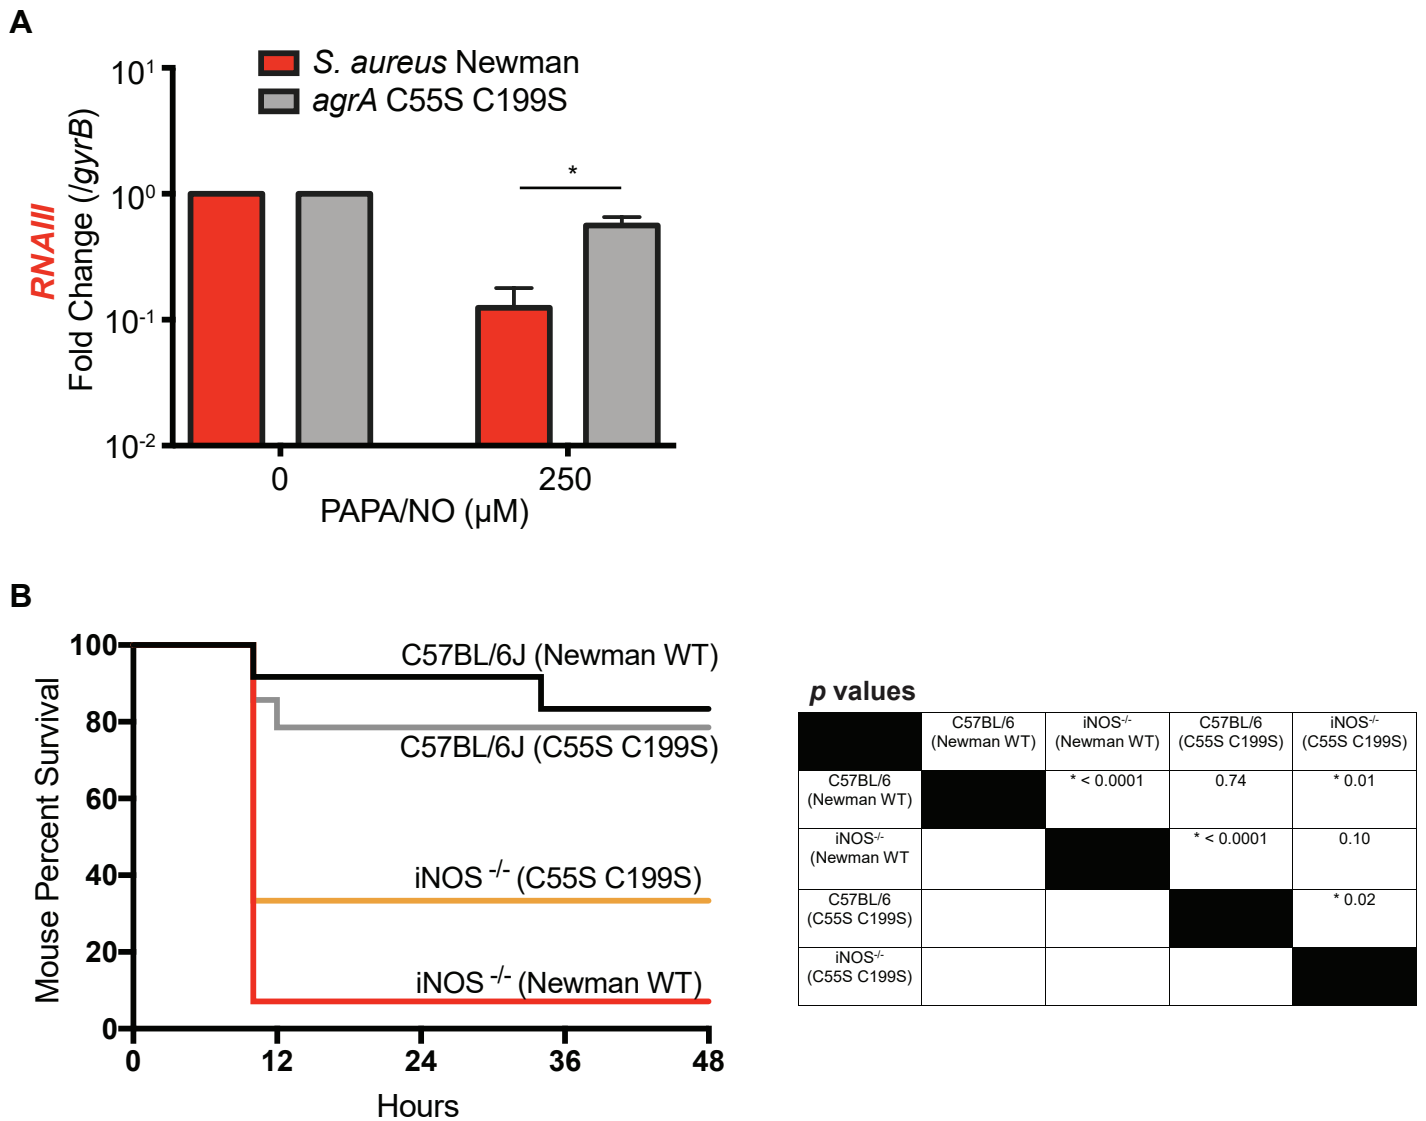

**Figure S7 Related to Figure 7. AgrA cysteine double mutant is partially resistant to Agr-inhibition by NO *in vitro* but not hypervirulent *in vivo***

(A) RT-qPCR of RNAIII in PAPA/NO-treated *S. aureus* Newman and *agrA* C55S C199S (double cysteine mutant) (n=3). Data are represented as means with error bars showing standard deviation. Student's t test, \**p*<0.05.

(B) Mouse percent mortality at indicated time points post-infection. C57BL/6 and congenic iNOS<sup>-/-</sup> mice were infected with either *S. aureus* Newman or *agrA* C55S C199S (~5 x 10<sup>7</sup> CFU, n > 12). Kaplan-Meier plot (left) and *p* values (right), \**p*<0.05.

**Table S2 Related to Figure 7. Histology Scores for Lung Sections**

| <b>Mouse Group<br/>(n=mice per group)</b>                | <b>Predominant<br/>Lesion Pattern</b> | <b>Mean Inflammatory<br/>Cell Accumulation<br/>(scale: 1-4)</b> | <b>Mean Bacterial<br/>Load<br/>(scale: 1-4)</b> |
|----------------------------------------------------------|---------------------------------------|-----------------------------------------------------------------|-------------------------------------------------|
| 4 h post-infection<br>Inoculum: $\sim 1 \times 10^8$ CFU |                                       |                                                                 |                                                 |
| C57BL/6 Males<br>(n=6)                                   | Alveolar                              | 1.2                                                             | 2.2                                             |
| C57BL/6 Females<br>(n=5)                                 | Alveolar                              | 1.2                                                             | 2.4                                             |
| iNOS <sup>-/-</sup> Males<br>(n=5)                       | Mixed                                 | 1                                                               | 2                                               |
| iNOS <sup>-/-</sup> Females<br>(n=6)                     | Mixed                                 | 1.3                                                             | 1.8                                             |
| 8 h post-infection<br>Inoculum: $\sim 1 \times 10^8$ CFU |                                       |                                                                 |                                                 |
| C57BL/6 Males<br>(n=7)                                   | Focal Aggregation                     | 3.9                                                             | 3                                               |
| C57BL/6 Females<br>(n=8)                                 | Focal Aggregation                     | 2.4                                                             | 2.5                                             |
| iNOS <sup>-/-</sup> Males<br>(n=6)                       | Alveolar                              | 1.8                                                             | 3.7                                             |
| iNOS <sup>-/-</sup> Females<br>(n=8)                     | Alveolar                              | 2.1                                                             | 2.5                                             |
| 8 h post-infection<br>Inoculum: $\sim 5 \times 10^7$ CFU |                                       |                                                                 |                                                 |
| C57BL/6 Females<br>(n=7)                                 | Mixed                                 | 2.1                                                             | 1.3                                             |
| iNOS <sup>-/-</sup> Females<br>(n=5)                     | Alveolar                              | 1                                                               | 1.8                                             |

**Table S3 Related to STAR METHODS. Primers Used in This Paper**

| <b>Primer</b>             | <b>Sequence 5'-3'</b>                                                  | <b>Reference</b> |
|---------------------------|------------------------------------------------------------------------|------------------|
| Cloning primers           |                                                                        |                  |
| RU044                     | ATATGGTACCCTCGGATGAAGCTAAAGTAATAAG                                     | This paper       |
| RU045B                    | GACTTTATTATCTTATTACATACATTCACATCCTT<br>A TGGCTAG                       | This paper       |
| RU048B                    | GGATGTGAATGTATGTAATAAGATAATAAAGTCA<br>G TTAACGGC                       | This paper       |
| RU049                     | ATATGCGGCCGCGTAAGCCCTCTGCTGATATG                                       | This paper       |
| RU044A                    | ATATGGTACCCTGCGCAAGTTCGGTCATGATTAT<br>GTC                              | This paper       |
| RU049AA                   | ATATGCGGCCGCTCATTTATACGAAGGGAGCAG<br>A TG                              | This paper       |
| <i>pIMAYΔagrC</i>         |                                                                        |                  |
| RU076                     | ATATGGTACCCGTATAATGACAGTGAGGAG                                         | This paper       |
| RU077                     | CACATCCTTATGGCTACATTTGAGTTAATACGAA<br>T AAAAC                          | This paper       |
| RU078                     | CGTATTAACTCAAATGTAGCCATAAGGATGTGAA<br>T GTATG                          | This paper       |
| RU079                     | ATATGCGGCCGCTCACCGATGCATAGCAGTG                                        | This paper       |
| <i>pIMAYagrA-HA</i>       |                                                                        |                  |
| RU138                     | TTAAGCATAATCTGGAACATCATATGGATATATTT<br>T TTTAACGTTTCTCACCGATGCATAGC    | This paper       |
| RU139                     | TATCCATATGATGTTCCAGATTATGCTTAATAAGA<br>T AATAAAGTCAGTTAACGGCG          | This paper       |
| <i>agrA</i>               |                                                                        |                  |
| RU106                     | ATATGGTACCCATAAGGATGTGAATGTATG                                         | This paper       |
| RU107                     | ATATGGATCCAACAAGATTTACAATTGAATACGC                                     | This paper       |
| <i>agrA-HA</i>            |                                                                        |                  |
| RU116                     | AGCATAATCTGGAACATCATATGGATATATTTTTT<br>TAACGTTTCTCACCGATGCATAGCAGTGTTT | This paper       |
| Site-directed mutagenesis |                                                                        |                  |
| <i>agrA</i> C6V           |                                                                        |                  |
| RU094                     | GGATGTGAATGTATGAAAATTTTCATTGTCTGAAG<br>AC GATCCAAAACAAAGAGAAAACATG     | This paper       |
| RU095                     | CATGTTTTCTCTTTGTTTTGGATCGTCTTCGACAA<br>T GAAAATTTTCATACATTCACATCC      | This paper       |
| <i>agrA</i> C55S          |                                                                        |                  |
| RU070                     | GCAAGCTAAAAATATGAATGACATAGGCTCTTAC<br>TT TTTAGATATTCAACTTTC            | This paper       |
| RU071                     | GCAAGCTAAAAATATGAATGACATAGGCTCTTAC<br>TT TTTAGATATTCAACTTTC            | This paper       |
| <i>agrA</i> C123N         |                                                                        |                  |

|                                 |                                                               |                              |
|---------------------------------|---------------------------------------------------------------|------------------------------|
| RU352                           | GCTGAATTAAGAACTCGAATTATAGACAATTTA<br>GAAACTGCACATACACGCTTAC   | This paper                   |
| RU353                           | GTAAGCGTGTATGTGCAGTTTCTAAATTGTCTAT<br>AA TTCGAGTTCTTAATTCAGC  | This paper                   |
| <i>pagrA</i> C199S              |                                                               |                              |
| RU050                           | GAGTCAATTAGATGATCGTTTCTTTAGATCTCAT<br>AA TAGCTTTGTGCGTCAATCGC | This paper                   |
| RU051                           | GCGATTGACGACAAAGCTATTATGAGATCTAAAG<br>A AACGATCATCTAATTGACTC  | This paper                   |
| pIMAY <i>agrC</i><br>C91S C371S |                                                               |                              |
| RU080                           | GTAACGTTTATTGTTATGAATAAATCCGCTGATG<br>AT ATACCACGCATTCATG     | This paper                   |
| RU081                           | CATGAATGCGTGGTATATCATCAGCGGATTTATT<br>CA TAACAATAAACGTTAC     | This paper                   |
| RU082                           | GACTTCGCAGATTATTCTATACTCTGCTAACTAC<br>AT GTATATAG             | This paper                   |
| RU083                           | CTATATACATGTAGTTAGCAGAGTATAGAATAAT<br>C TGCGAAGTC             | This paper                   |
| qPCR primers                    |                                                               |                              |
| <i>agrA</i> _F                  | GAAGACGATCCAAAACAAAGAG                                        | This paper                   |
| <i>agrA</i> _R                  | GTCATTCATATTTTTAGCTTGCTC                                      | This paper                   |
| <i>agrB</i> _F                  | CCAGTTTGCCACGTATCTTC                                          | This paper                   |
| <i>agrB</i> _R                  | GCACCATGTGCATGTCTTC                                           | This paper                   |
| <i>agrIR</i> _F                 | GAAGATACGTGGCAAACCTGGTC                                       | This paper                   |
| <i>agrIR</i> _R                 | TCCTACAGTTAGGCAATATAATG                                       | This paper                   |
| ChIP <sub>c</sub> _F            | CAAATGCACTGTATAGCTGGC                                         | This paper                   |
| ChIP <sub>c</sub> _R            | CAAATAAGATTACCGGAGTAGG                                        | This paper                   |
| <i>gmk</i> _F                   | AAGGTGCAAAGCAAGTTAGAA                                         | Hirschhausen<br>et al., 2012 |
| <i>gmk</i> _R                   | CTTTACGCGCTTCGTTAATAC                                         | Hirschhausen<br>et al., 2012 |
| <i>gyrB</i> _F                  | TTATGGTGCTGGGCAAATACA                                         | Goerke et al.,<br>2000       |
| <i>gyrB</i> _R                  | CACCATGTAAACCACCAGATA                                         | Goerke et al.,<br>2000       |
| <i>hmp</i> _F                   | CGTTTAACGCCAAAAGTTAAATGG                                      | Richardson et<br>al., 2006   |
| <i>hmp</i> _R                   | TGACTTTAGTGAATTTACACCAGG                                      | Richardson et<br>al., 2006   |
| <i>nrdG</i> _F                  | CAGTGTTTATGTATCAGGATGTCC                                      | Richardson et<br>al., 2006   |
| <i>nrdG</i> _R                  | GTTCGCCACCTAATAGACTTAGCC                                      | Richardson et<br>al., 2006   |
| <i>proC</i> _F                  | GGCAGGTATTCCGATTGA                                            | Theis et al.,                |

|                 |                            |                            |
|-----------------|----------------------------|----------------------------|
|                 |                            | 2007                       |
| proC_R          | CCAGTAACAGAGTGTCCAAC       | Theis et al.,<br>2007      |
| psm $\alpha$ _F | CATCGCTGGCATCATTAAAG       | This paper                 |
| psm $\alpha$ _R | 5-ACCAGTGAATTTCTCAATTAATCC | This paper                 |
| psm $\beta$ _F  | CGCAATTAAAGATACCGTAACTG    | This paper                 |
| psm $\beta$ _R  | CGATTGCTTCTGCTAGTCCAG      | This paper                 |
| RNAIII_F        | GAAGGAGTGATTTCAATGG        | Goerke et al.,<br>2000     |
| RNAIII_R        | TAAGAAAAATACATAGCACTGAG    | Goerke et al.,<br>2000     |
| rpoD_F          | AACTGAATCCAAGTGATCTTAGTG   | Richardson et<br>al., 2006 |
| rpoD_R          | TCATCACCTTGTTCAATACGTTTG   | Richardson et<br>al., 2006 |
